# Supplementary material for: LncRNA TP73-AS1 sponges miR-141-3p to promote the migration and invasion of pancreatic cancer cells through the up-regulation of BDH2
Source: PubMed Central journal article supplement (PMC6418400; doi:10.1042/bsr20181937), 2019-03-15

Blank                      miR-NC                      miR-141 inhibitor                      miR-NC +miR-141 inhibitor

BDH2

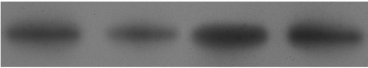

GAPDH

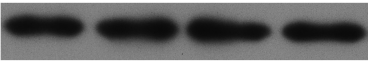

Supplement: bsr-39-bsr20181937_Supp1.pdf [file bsr-39-bsr20181937_Supp1.pdf]
